# Supplementary material for: Rare Occurrence of Blastocystis in Pet Animals and Their Owners in the Pomeranian Voivodeship in Poland in the Light of Literature Data
Source: MDPI journal article supplement (doi:10.3390/jcm11112975), 2022-05-25
Supplement: s1 [file s1]

**Table S1.** Summary of data on *Blastocystis* in dogs, calculated on the basis of the data from Table 1.

| <b>Dogs</b>      | <b>Positive Samples</b> | <b>Negative Samples</b> | <b>Percentage of Positive Samples</b> |
|------------------|-------------------------|-------------------------|---------------------------------------|
| Kept indoors     | 120                     | 1508                    | 7,37%                                 |
| From rural areas | 2                       | 207                     | 0,96%                                 |
| Shelter-resident | 117                     | 306                     | 27,66%                                |
| Stray            | 56                      | 274                     | 20,44%                                |
